# Supplementary material for: Identification of an ATP metabolism‐related signature associated with prognosis and immune microenvironment in gliomas
Source: PubMed Central journal article supplement — Cancer Sci. 2020 May 29;111(7):2325–35. doi: 10.1111/cas.14484 (PMC7385348; doi:10.1111/cas.14484), 2020-05-29
Supplement: CAS-111-2325-s001.pdf [file CAS-111-2325-s001.pdf]

## Supplementary Materials

**Figure S1**

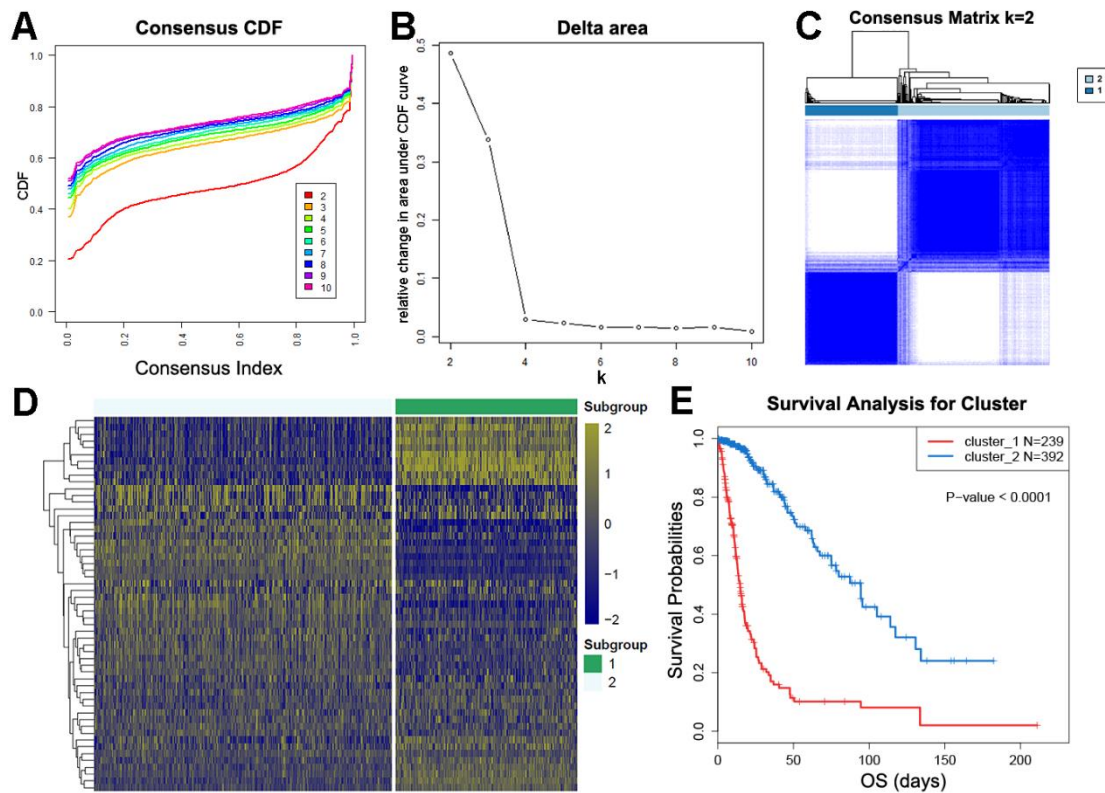

**Figure S1.** Consensus clustering for ATP metabolism-related genes in glioma patients from TCGA dataset. (A) Consensus clustering CDF for  $k = 2$  to  $k = 10$ . (B) Relative change in area under CDF curve for  $k = 2$  to  $k = 10$ . (C) Consensus clustering matrix of 631 samples from TCGA dataset for  $k = 2$ . (D) Heat map of two clusters defined by the top 55 variable expression genes. (E) K-M survival curve of patients in two clusters.

**Figure S2**

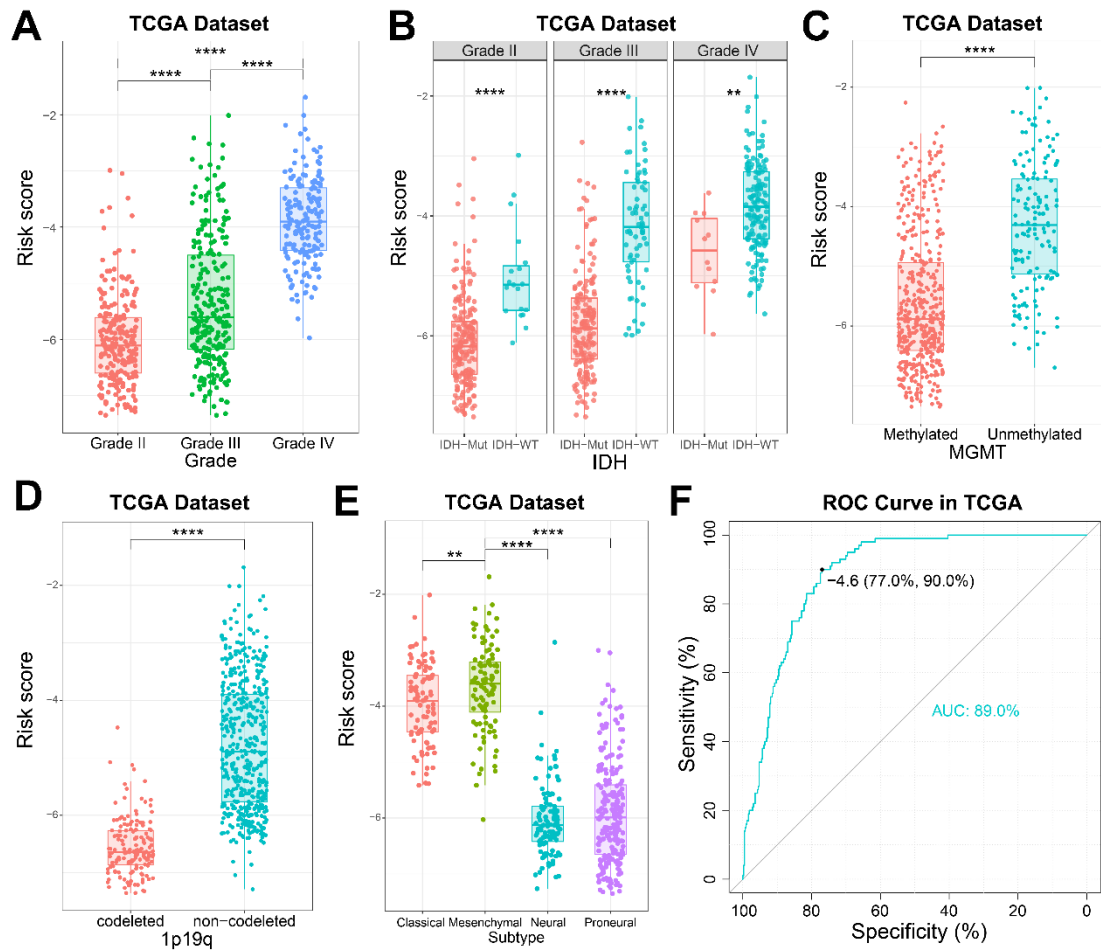

**Figure S2.** Association between pathologic characteristics and the ATP metabolism-related signature in TCGA dataset. (A-E) Distribution of the risk score in stratified patients by WHO grade, TCGA molecular subtype, IDH mutation status, MGMT promoter methylation, 1p/19q co-deletion status and TCGA molecular subtypes. (F) ROC curves predicted ATP metabolism as a biomarker of mesenchymal subtype glioma. \*\*  $p < 0.01$ , \*\*\*\*  $p < 0.0001$ .

**Figure S3**

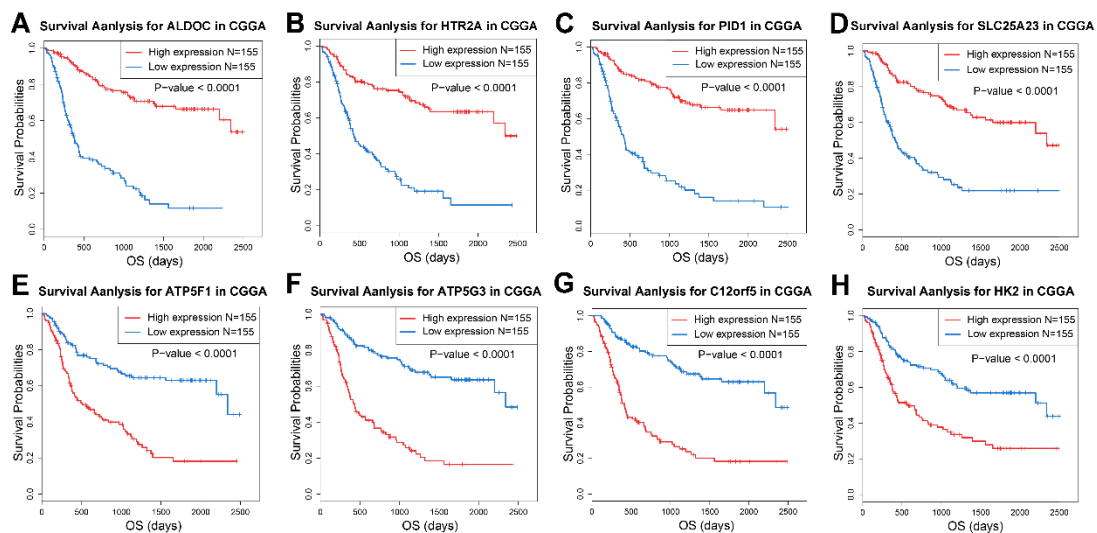

**Figure S3.** Kaplan-Meier survival curves of OS based on the expression of each independent gene in the ATP metabolism-related signature in CGGA dataset.

**Figure S4**

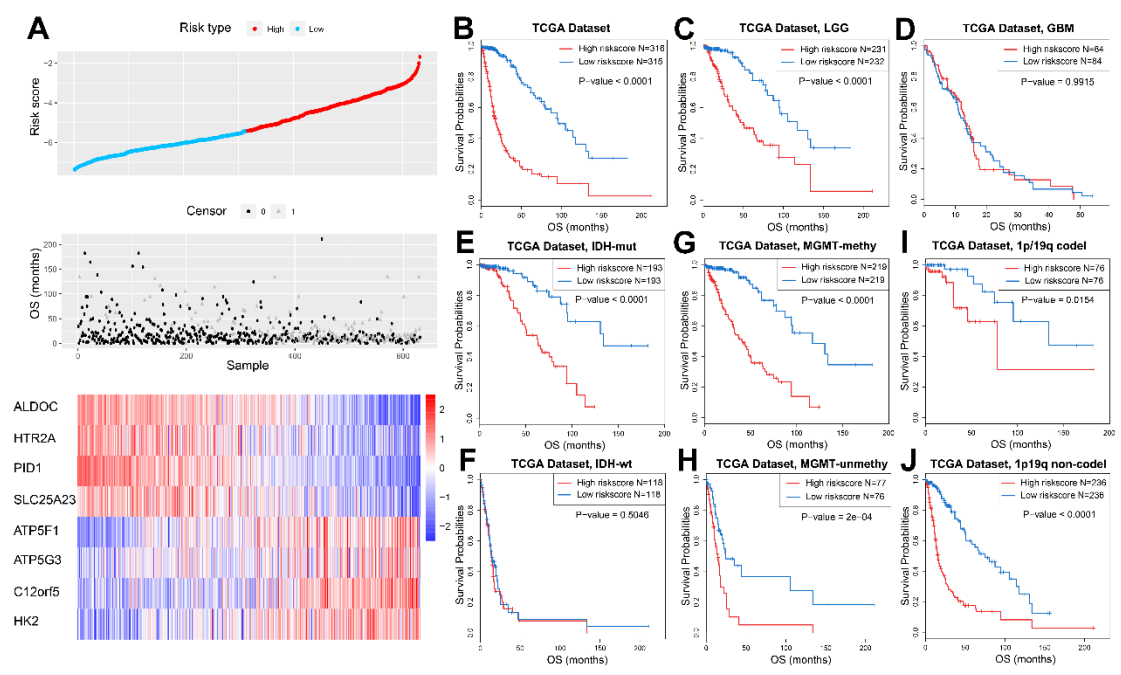

**Figure S4.** The prognostic value of the risk signature in TCGA dataset. (A) Distribution of the risk score, OS and expression level of 8 genes in the risk signature. (B-J) K-M survival analysis of the risk signature in glioma patients stratified by WHO grade, IDH mutation status, MGMT promoter methylation and 1p/19q co-deletion status.

**Figure S5**

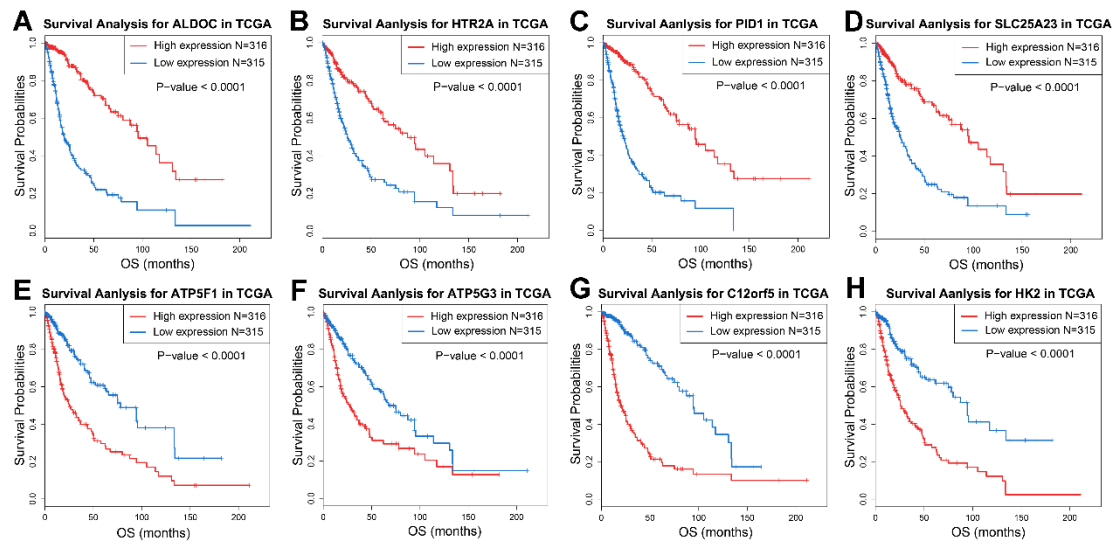

**Figure S5.** Kaplan-Meier survival curves of OS based on the expression of each independent gene in the ATP metabolism-related signature in TCGA dataset.

**Figure S6**

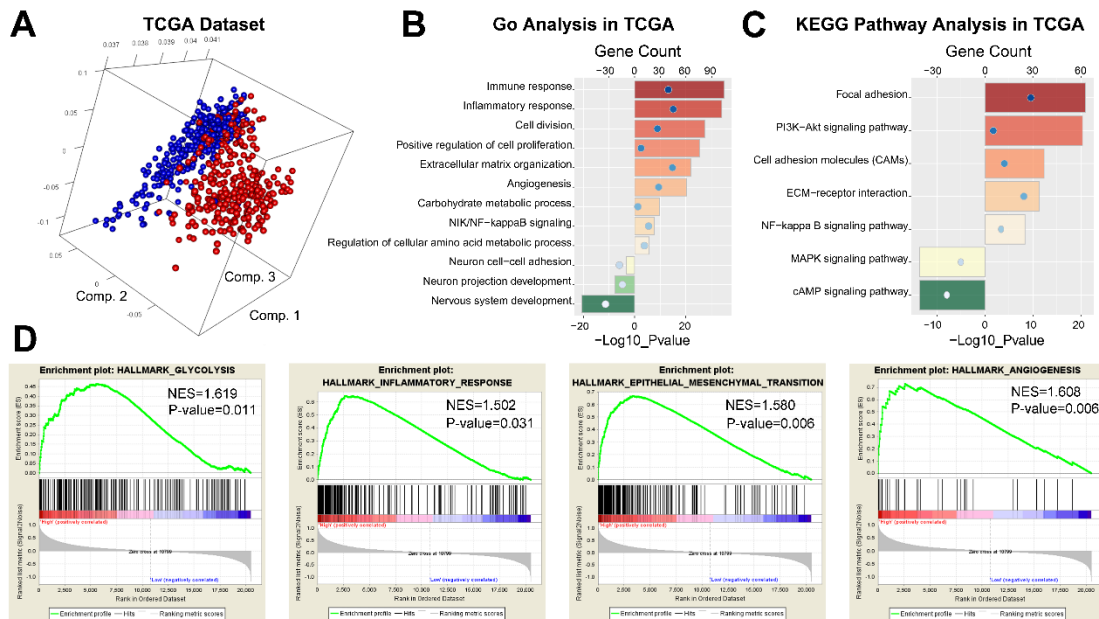

**Figure S6.** Functional analysis of the ATP metabolism-related signature in TCGA dataset. (A) Principal components analysis of whole gene expression data between high-risk and low-risk group. (B, C) GO and KEGG pathway analyses were performed via the DAVID website to explore the functional annotation of the risk signature. (D) GSEA analysis was used to explore the biological functions and pathways that were significantly enriched in patients with high risk score.

**Figure S7**

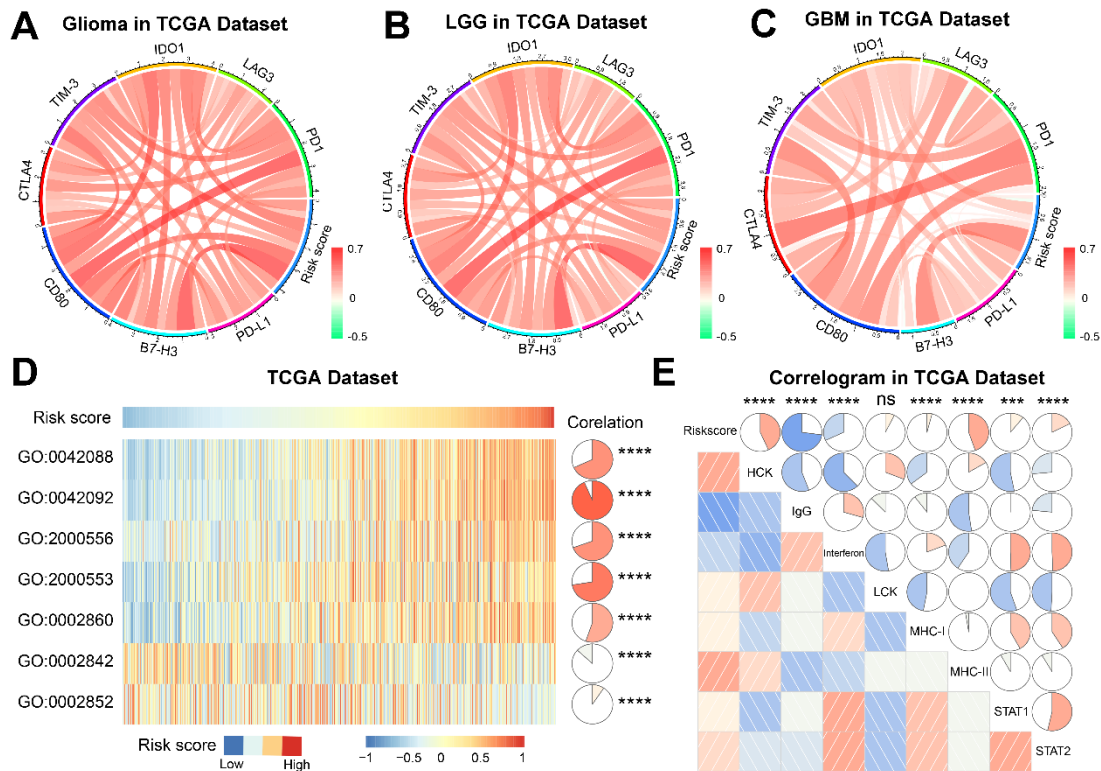

**Figure S7.** The 8-gene signature related immune responses and inflammatory activities in gliomas in TCGA dataset. (A-C) Correlation analysis between immune checkpoint members and risk signature in whole gliomas, low-grade gliomas and GBM, respectively. (D) The relationship between the risk signature and T cell related immunity. GO:0042088: T-helper 1 type immune response, GO:0042092: T-helper 2 type immune response, GO:2000556: positive regulation of T-helper 1 cell cytokine production, GO:2000553: positive regulation of T-helper 2 cell cytokine production, GO:0002860: positive regulation of natural killer cell mediated cytotoxicity directed against tumor cell target, GO:0002842: positive regulation of T cell mediated immune response to tumor cell, GO:0002852: regulation of T cell mediated cytotoxicity directed against tumor cell target. (E) The relationship between CMTM6 and inflammatory activities. \*\*\*  $p < 0.001$ , \*\*\*\*  $p < 0.0001$ , ns: no statistically significant.

**Figure S8**

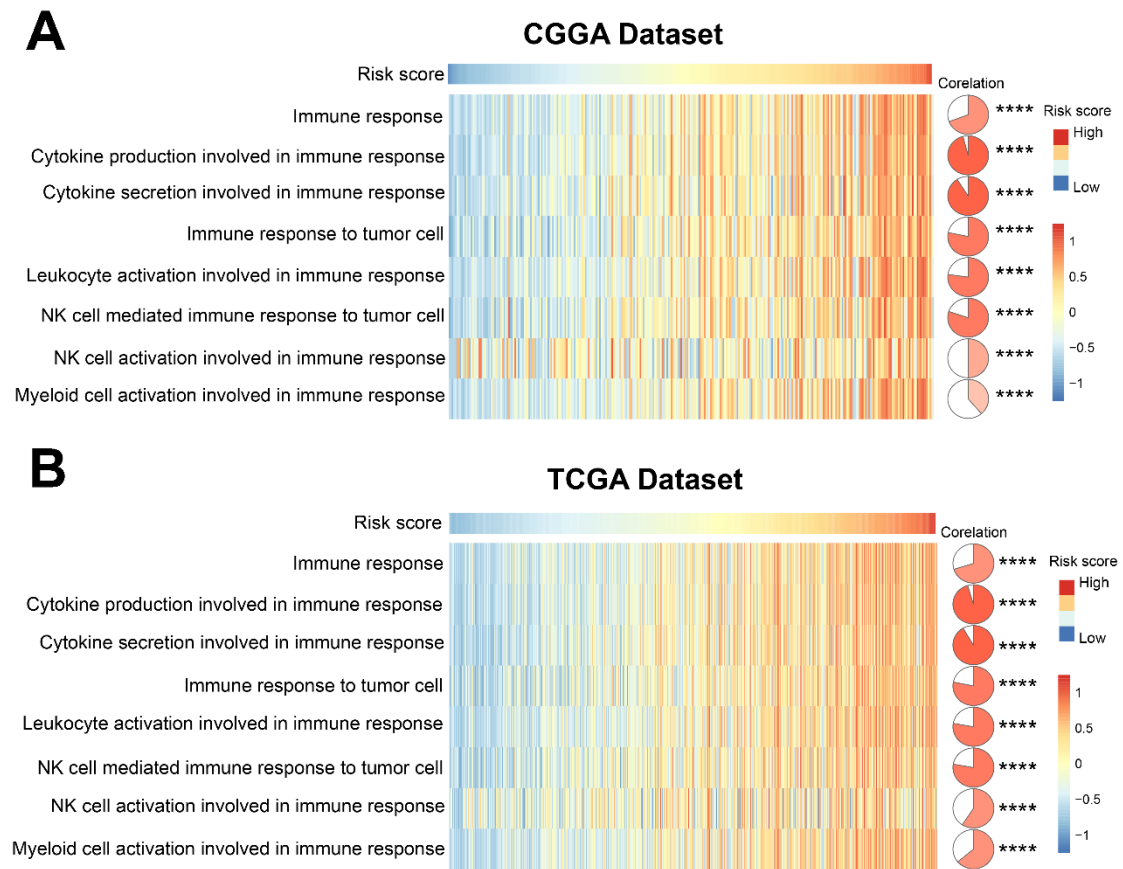

**Figure S8.** Association between the risk signature and immune response mediated by various immune cells in CGGA dataset (A) and TCGA dataset (B). \*\*\*\*  $p < 0.0001$ .



**Figure S9**

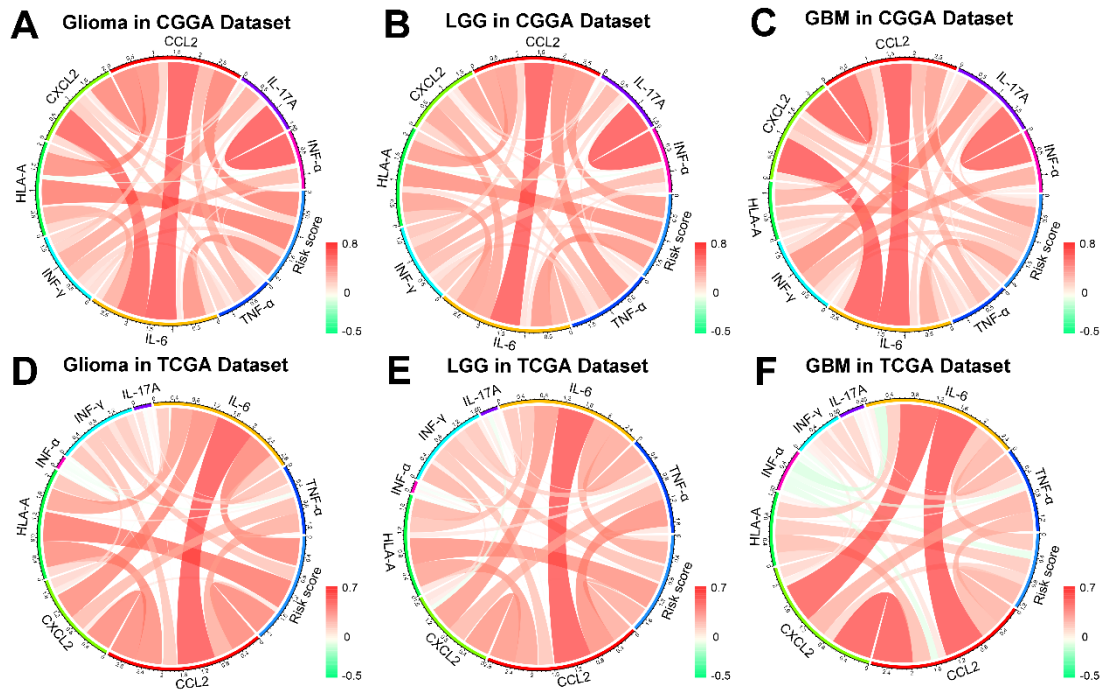

**Figure S9.** Correlation analysis between inflammatory genes and risk signature in whole gliomas, low-grade gliomas and GBM in CGGA dataset (A-C) and TCGA dataset (D-F).

**Table S1**

| <b>ATP metabolism related gene list</b> |          |          |            |          |
|-----------------------------------------|----------|----------|------------|----------|
| ALDOC                                   | DDIT4    | INSR     | ATP5G1     | C11orf83 |
| PID1                                    | ENO2     | PGAM4    | IGF1       | ENO4     |
| HDAC4                                   | NCOR1    | ATP6V0A4 | ENO3       | ATP5H    |
| SLC25A23                                | ATP5A1   | PRKAA2   | TPI1       | PFKFB4   |
| DHTKD1                                  | ATP5O    | GPD1     | GADD45GIP1 | GPI      |
| HTR2A                                   | ALDOB    | APOC3    | GALK1      | ENO1     |
| PFKM                                    | ATP5G2   | CHCHD10  | MYOG       | PGAM2    |
| PPIF                                    | PRKAG2   | ENTPD5   | PARK7      | VCP      |
| ATP5S                                   | HKDC1    | ALDOA    | ATP5L      | ATP5E    |
| LDHA                                    | OGT      | PGK2     | OGDH       | STAT3    |
| PPARGC1A                                | ATP5B    | DNAJC15  | BPGM       | ATP5F1   |
| PINK1                                   | ATP5D    | ATP5J    | PFKL       | FBP1     |
| ATP6V0A1                                | SURF1    | HK1      | ATPIF1     | GAPDH    |
| PPARA                                   | PFKFB2   | ATP5L2   | ATP5EP2    | TSPO     |
| P2RX7                                   | PFKFB1   | ATP5I    | PRKAA1     | PGK1     |
| OGDHL                                   | PRKAG1   | LDHC     | SIRT6      | ATP5G3   |
| PGAM1                                   | ACTN3    | C1orf177 | DNM1L      | HK2      |
| SNCA                                    | CBFA2T3  | GCK      | ATP6V0A2   | TGFB1    |
| SLC25A33                                | SLC25A13 | GAPDHS   | FLCN       | ADPGK    |
| PFKP                                    | AKD1     | PFKFB3   | PGM1       | C12orf5  |
| ECD                                     | ATP5C1   | ARNT     | ATP7A      | TCIRG1   |
| GBAS                                    | PKLR     | INS      | HIF1A      | HK3      |

**Table S2. Characteristics of patients in cluster 1 and cluster 2 in TCGA database**

| <b>Characteristic</b> | <b>N</b> | <b>Cluster 1</b> | <b>Cluster 2</b> | <b>p value</b> |
|-----------------------|----------|------------------|------------------|----------------|
| <b>Total cases</b>    | 631      | 239              | 392              |                |
| <b>Gender</b>         |          |                  |                  | 0.6031         |
| Male                  | 364      | 141              | 223              |                |
| Female                | 267      | 98               | 169              |                |
| <b>Age (years)</b>    |          |                  |                  | <0.0001        |
| ≤40                   | 244      | 31               | 213              |                |
| > 40                  | 387      | 208              | 179              |                |
| <b>Grade</b>          |          |                  |                  | <0.0001        |
| II                    | 221      | 10               | 211              |                |
| III                   | 242      | 64               | 178              |                |
| IV                    | 168      | 165              | 3                |                |
| <b>Subtype</b>        |          |                  |                  | <0.0001        |
| Classical             | 89       | 86               | 3                |                |
| Mesenchymal           | 100      | 92               | 8                |                |
| Proneural             | 226      | 24               | 202              |                |
| Neural                | 104      | 8                | 96               |                |
| <b>IDH Status</b>     |          |                  |                  | <0.0001        |
| Mutation              | 386      | 20               | 366              |                |
| Wildtype              | 236      | 212              | 24               |                |
| <b>MGMT Promoter</b>  |          |                  |                  | <0.0001        |
| Methylation           | 438      | 88               | 350              |                |
| Unmethylation         | 154      | 113              | 41               |                |
| <b>1p19q</b>          |          |                  |                  | <0.0001        |
| Codel                 | 152      | 2                | 150              |                |
| Intact                | 472      | 231              | 241              |                |

**Table S3. Univariate and multivariate analysis of OS in TCGA sequencing database**

| <b>Variables</b>           | <b>Univariate analysis</b> |                | <b>Multivariate analysis</b> |                |
|----------------------------|----------------------------|----------------|------------------------------|----------------|
|                            | <b>HR (95% CI)</b>         | <b>p value</b> | <b>HR (95% CI)</b>           | <b>p value</b> |
| <b>Risk score</b>          | 1.845 (1.670-2.041)        | < 0.001        | 1.313 (1.062-1.624)          | 0.012          |
| <b>Age at Diagnosis</b>    | 1.073 (1.061-1.084)        | < 0.001        | 1.064 (1.047-1.080)          | < 0.001        |
| <b>Gender</b>              | 1.111 (0.840-1.469)        | 0.462          | -                            | -              |
| <b>WHO Grade</b>           | 4.794 (3.798-6.051)        | < 0.001        | 1.803 (1.266-2.567)          | 0.001          |
| <b>TCGA Subtype</b>        | 2.004 (1.765-2.275)        | < 0.001        | 1.074 (0.860-1.342)          | 0.527          |
| <b>IDH mutation status</b> | 0.117 (0.085-0.161)        | < 0.001        | 0.948 (0.474-1.899)          | 0.881          |
| <b>MGMT methylation</b>    | 0.337 (0.247-0.461)        | < 0.001        | 0.735 (0.487-1.108)          | 0.141          |
| <b>1p19q co-deletion</b>   | 0.228 (0.139-0.376)        | < 0.001        | 0.590 (0.318-1.095)          | 0.094          |
